# Supplementary material
Source: publisher figshare collection journal article supplement (https://sage.figshare.com/ndownloader/files/25057621)
Supplement: Supplementary file 1 [file 25057621]

## **Supplement 1**

### Classification of the central pulse waveform (Murgó-Nichols)

Type A: Peak systolic blood pressure ( $P_s$ ) occurs in late systole after a well-defined inflection point ( $P_i$ ) and  $AIx$  is greater than 12%

Type B: Peak systolic blood pressure ( $P_s$ ) also occurs in late systole following an inflection point ( $P_i$ ), but  $AIx$  is greater than 0.0% and less than or equal to 12%

Type C: The inflection point ( $P_i$ ) occurs after peak systolic blood pressure ( $P_s$ ) and  $AIx$  is less than or equal to 0.0%

Type D: There is no inflection point on the measured pressure wave because the reflected wave arrives early in systole and merges (or blends) with the incident wave and  $AIx$  is expected to be  $>>12\%$

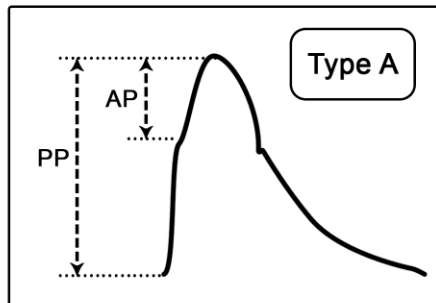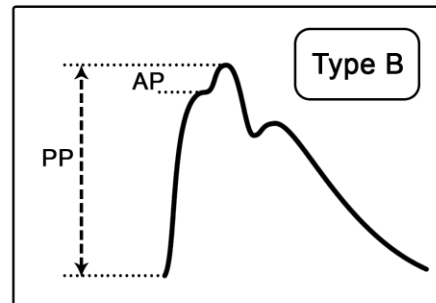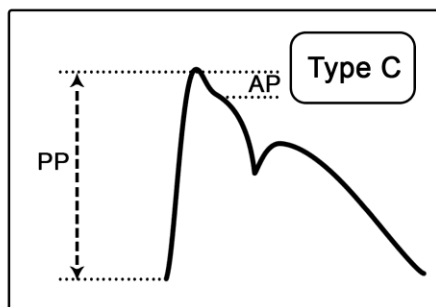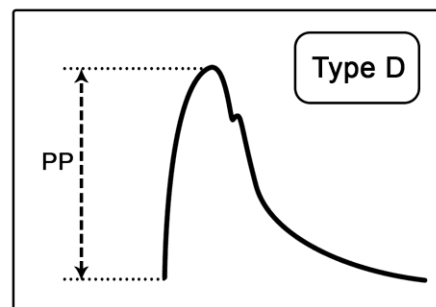

**Supplement 1** Classification by Murgo-Nichols: *PP*, pulse pressure; *AP*, augmented pressure, due to backward waves
